# Supplementary material for: Roles of High Osmolarity Glycerol and Cell Wall Integrity Pathways in Cadmium Toxicity in Saccharomyces cerevisiae
Source: MDPI journal article supplement (doi:10.3390/ijms22126169), 2021-06-08
Supplement: s1 [file s1]

**Table S1.** Primers used in this study

| Name         | Sequence (5'-3')                                                          |
|--------------|---------------------------------------------------------------------------|
| Hog1-CF      | ttacggactacggtaaccaggccatacagtacgctaagtgattccaacag<br>CGGATCCCCGGGTAAATTA |
| Hog1-CR      | aaaacagaaaaaatcatgatcgaaatcgtccactttactttgtaattg<br>GAATTCGAGCTCGTTTAAAC  |
| Slt2-CF      | ttctagaccttgaaaaagagctggagtttgattagatagaaaaatattt<br>CGGATCCCCGGGTAAATTA  |
| Slt2-CR      | agataagcgtcggaggaggaatttgatatacagctacaacaagagcacg<br>GAATTCGAGCTCGTTTAAAC |
| Hog1-check-F | tatctgccacgtttgatgacc                                                     |
| Hog1-check-R | ataagtgcgggttcttgagtc                                                     |
| Slt2-check-F | agagtatgatggagatgagacctg                                                  |
| Slt2-check-R | ttattactgctactggattccc                                                    |
| Slt2-LF      | CGGGGTAC <u>C</u> tatgtgaggtggacagtggg, KpnI site underlined              |
| Slt2-LR      | CggAATTCatcttgattgaagaccttgaaag, EcoRI site underlined                    |
| HAC1-RT-F    | aggaaaaggaacagcgaagg                                                      |
| HAC1-RT-R    | gaattcaaacctgactgcgc                                                      |
